# Supplementary material for: Cytological and proteomic analyses of horsetail (Equisetum arvense L.) spore germination
Source: Front Plant Sci. 2015 Jun 17;6:441. doi: 10.3389/fpls.2015.00441 (PMC4469821; doi:10.3389/fpls.2015.00441)
Supplement: Supplementary file 9 [file Table5.XLSX]

## Sheet: Sheet1
Supplementary Table S5. Homologs of E. arvense spore proteins in Arabidopsis found by sequence BLASTing in TAIR database
Spot No.(a)	Protein name(b)	Plant spieces(c)	Gi No.(d)	Sequence(e)	Accession number in Arabidopsis(f)	Protein name in Arabidopsis(g)	Score (bits)(h)	E-value(i)	Sequence identity (%)(j)
	Photosynthesis (17)
121	Chlorophyll a/b binding protein (CAB)	Hedera helix	12582	PGDYGWDTSRGLSADPETFAKNRELEVIHSRWAMLGALGCVFPELLARNGVKFGEAVWFKAGAQIFSEGGLDYLGNPSLVHAQSILAIWATQVILMGAVEGYRIAGGPLGEVVDPLYPGGSFDPLGLAEDPEAFAELKVKELKNGRLAMFSMFGFFVQAIVTGKGPLENLADHLADPVNNNAWAYATNFVPGK	AT3G27690	Photosystem II light harvesting complex gene 2.3	355	1e-98	88
346	Ribulose-1,5-bisphosphate carboxylase/oxygenase large subunit (RBCL)	Eryngium bourgatii	1292976	XXXXXXXKASVGFKAGVKDYKLNYYTPEYETKDTDILAAFRVTPQPGVPPEEAGAAVAAESSTGTWTTVWTDGLTSLDRYKGRCYEIEPVPGEESQFIAYVAYPLDLFEEGSVTNMFTSIVGNVFGFKALRALRLEDLRIPVAYVKTFQGPPHGIQVERDKLNKYGRPLLGCTIKPKLGLSAKNYGRAVYECLRGGLDFTKDDENVNSQPFMRWRDRFLFCAEALYKAQAETGEIKGHYLNATAGTCEDMMKRAVFARELGVPIVMHDYLTGGFTANTTLAHYCRDNGLLLHIHRAMHAVIDRQEESWYXFRVLAKALRMSGGDHIHSGTVVGKLEGERDITLGFVDLLRDDYIEKDRSRGIYFAQDWVSLPGVLPVASGGIHVWHMPALTEIFGDDSV…	ATCG00490	Ribulose-bisphosphate carboxylases	870	0	89
763	Ribulose-1,5-bisphosphate carboxylase/oxygenase large subunit (RBCL)	Donatia fascicularis	1304292	SVGFKAGVKDYKLTYXTPDYETKDTDILAAFRVTPQPGVPPEEAGAAVAAESSTGTWTTVWTDGLTSLDRYKGRCYHIEPVAGEESQFIAYVAYPLDLFEEGSVTNMFTSIVGNVFGFKALRALRLEDLRIPPAYVKTFQGPPHGIQVERDKLNKYGRPLLGCTIKPKLGLSAKNYGRAVYECLRGGLDFTKDDENVNSQPFMRWRDRFLFCAEAIYKAQAETGEIKGHYLNATAGTCEEMIKRAIFARELGVPIVMHDYITGGFTANTSLAHYCRDNGLLLHIHRAMHAVIDRQKNHGIHFRVLAKALRMSGGDHIHAGTVVGKLEGEREITLGFVDLLRDDYIEKDRSRGIYFTQDWVSLPGVLPVASGGIHVWHMPALTEIFGDDSVLQFGGGTLG…	ATCG00490	Ribulose-bisphosphate carboxylases	864	0	92
902	Ribulose-1,5-bisphosphate carboxylase/oxygenase large subunit (RBCL)	Grammitis diminuta	340031166	YYTPEYKXKDTDILAAFRMTPQPGVPAEEAGAAVAAESSTGTWTTVWTDGLTSLDRYKGRCYDIEPVAGEDNQYIAYVAYPLDLFEEGSVTNLFTSIVGNVFGFKALRALRLEDLRIPPAYSKTFIGPPHGIXVERDKLNKYGRPLLGCTIKPKLGLSAKNYGRAVYECLXGGLDFTKEDENVNSXPFMRWRDRFLFVAEALFKSQAETGEVKGHYLNATAGTIEEMMKRVRFARELGAPIVMHDYLTGGFTANTSLAIYCRDNGLLLHIHRAMHAVIDRQRNHGMHFRVLAKALRMSGGDHVHAGTVVGKLEGEREVTLGFVDLXRDDYIEKDXKRGVYFTQDWVSMPGVLPVASGGIHVWHMPALTEIFGDDSVLQFGGGTLGHPWXNAPGAVANRV…	ATCG00490	Ribulose-bisphosphate carboxylases	748	0	86
117	Ribulose-1,5-bisphosphate carboxylase/oxygenase large subunit (RBCL)	Equisetum telmateia	16565336	GFKAGVKDYRLTYFTPDYETKDTDILAAFRMTPQPGVPPEEAGAAVAAESSTGTWTTVWTDGLTSLDRYKGRCYNIEPVAGEDNQFIAYVAYPLDLFEEGSVTNLFTSIVGNVFGFKALRALRLEDLRIPPAYSKTFIGPPHGIQVERDKLNKYGRPLLGCTIKPKLGLSAKNYGRAVYECLRGGLDFTKDDENVNSQPFMRWRDRFLFVAEALFKSQAETGEIKGHYLNATAGTCEEMLKRAVFARELGAPIIMHDYLTGGFTANTSLAFYCRDNGLLLHIHRAMHAVIDRQKNHGIHFRVLAKALRMSGGDHIHAGTVVGKLEGERDLTLGFVDLLRDDFIEKDRSRGIYFTQDWVSMPGVLPVASGGIHVWHMPALTEIFGDDSVLQFGGGTLGHP…	ATCG00490	Ribulose-bisphosphate carboxylases	822	0	88
196	Ribulose-1,5-bisphosphate carboxylase/oxygenase large subunit (RBCL)	Equisetum telmateia	16565336	GFKAGVKDYRLTYFTPDYETKDTDILAAFRMTPQPGVPPEEAGAAVAAESSTGTWTTVWTDGLTSLDRYKGRCYNIEPVAGEDNQFIAYVAYPLDLFEEGSVTNLFTSIVGNVFGFKALRALRLEDLRIPPAYSKTFIGPPHGIQVERDKLNKYGRPLLGCTIKPKLGLSAKNYGRAVYECLRGGLDFTKDDENVNSQPFMRWRDRFLFVAEALFKSQAETGEIKGHYLNATAGTCEEMLKRAVFARELGAPIIMHDYLTGGFTANTSLAFYCRDNGLLLHIHRAMHAVIDRQKNHGIHFRVLAKALRMSGGDHIHAGTVVGKLEGERDLTLGFVDLLRDDFIEKDRSRGIYFTQDWVSMPGVLPVASGGIHVWHMPALTEIFGDDSVLQFGGGTLGHP…	ATCG00490	Ribulose-bisphosphate carboxylases	822	0	88
194	Ribulose-1,5-bisphosphate carboxylase/oxygenase large subunit (RBCL)	Equisetum telmateia	16565336	GFKAGVKDYRLTYFTPDYETKDTDILAAFRMTPQPGVPPEEAGAAVAAESSTGTWTTVWTDGLTSLDRYKGRCYNIEPVAGEDNQFIAYVAYPLDLFEEGSVTNLFTSIVGNVFGFKALRALRLEDLRIPPAYSKTFIGPPHGIQVERDKLNKYGRPLLGCTIKPKLGLSAKNYGRAVYECLRGGLDFTKDDENVNSQPFMRWRDRFLFVAEALFKSQAETGEIKGHYLNATAGTCEEMLKRAVFARELGAPIIMHDYLTGGFTANTSLAFYCRDNGLLLHIHRAMHAVIDRQKNHGIHFRVLAKALRMSGGDHIHAGTVVGKLEGERDLTLGFVDLLRDDFIEKDRSRGIYFTQDWVSMPGVLPVASGGIHVWHMPALTEIFGDDSVLQFGGGTLGHP…	ATCG00490	Ribulose-bisphosphate carboxylases	822	0	88
400	Ribulose-1,5-bisphosphate carboxylase/oxygenase large subunit (RBCL)	Equisetum telmateia	16565336	GFKAGVKDYRLTYFTPDYETKDTDILAAFRMTPQPGVPPEEAGAAVAAESSTGTWTTVWTDGLTSLDRYKGRCYNIEPVAGEDNQFIAYVAYPLDLFEEGSVTNLFTSIVGNVFGFKALRALRLEDLRIPPAYSKTFIGPPHGIQVERDKLNKYGRPLLGCTIKPKLGLSAKNYGRAVYECLRGGLDFTKDDENVNSQPFMRWRDRFLFVAEALFKSQAETGEIKGHYLNATAGTCEEMLKRAVFARELGAPIIMHDYLTGGFTANTSLAFYCRDNGLLLHIHRAMHAVIDRQKNHGIHFRVLAKALRMSGGDHIHAGTVVGKLEGERDLTLGFVDLLRDDFIEKDRSRGIYFTQDWVSMPGVLPVASGGIHVWHMPALTEIFGDDSVLQFGGGTLGHP…	ATCG00490	Ribulose-bisphosphate carboxylases	822	0	88
23	Ribulose-1,5-bisphosphate carboxylase/oxygenase large subunit (RBCL)	Eryngium bourgatii	1292976	XXXXXXXKASVGFKAGVKDYKLNYYTPEYETKDTDILAAFRVTPQPGVPPEEAGAAVAAESSTGTWTTVWTDGLTSLDRYKGRCYEIEPVPGEESQFIAYVAYPLDLFEEGSVTNMFTSIVGNVFGFKALRALRLEDLRIPVAYVKTFQGPPHGIQVERDKLNKYGRPLLGCTIKPKLGLSAKNYGRAVYECLRGGLDFTKDDENVNSQPFMRWRDRFLFCAEALYKAQAETGEIKGHYLNATAGTCEDMMKRAVFARELGVPIVMHDYLTGGFTANTTLAHYCRDNGLLLHIHRAMHAVIDRQEESWYXFRVLAKALRMSGGDHIHSGTVVGKLEGERDITLGFVDLLRDDYIEKDRSRGIYFAQDWVSLPGVLPVASGGIHVWHMPALTEIFGDDSV…	ATCG00490	Ribulose-bisphosphate carboxylases	870	0	89
528	Ribulose-1,5-bisphosphate carboxylase/oxygenase large subunit (RBCL)	Equisetum arvense	1352773	MSPQTETKAGVGFKAGVKDYRLTYFTPDYETKDTDILAAFRMTPQPGVPPEEAGAAVAAESSTGTWTTVWTDGLTSLDRYKGRCYNIEPVAGEDNQFIAYVAYPLDLFEEGSVTNLFTSIVGNVFGFKALRALRLEDLRIPPAYSKTFIGPPHGIQVERDKLNKYGRPLLGCTIKPKLGLSAKNYGRAVYECLRGGLDFTKDDENVNSQPFMRWRDRFLFVAEALFKSQAETGEIKGHYLNATAGTCEEMLKRAVFARELGAPIVMHDYLTGGFTANTSLAFYCRDNGLLLHIHRAMHAVIDRQKNHGIHFRVLAKALRMSGGDHIHTGTVVGKLEGERDLTLGFVDLLRDDFIEKDRSRGIYFTQDWVSMPGVLPVASGGIHVWHMPALTEIFGDDSV…	ATCG00490	Ribulose-bisphosphate carboxylases	880	0	88
100	Ribulose-1,5-bisphosphate carboxylase/oxygenase large subunit (RBCL)	Isoetes capensis	83032384	PDYKTKDTDILAAFRMTPQPGVPPEEAGAAVAAESSTGTWTTVWTDGLTSLDRYKGRCYDIEPVAGEENQYIAYVAYPLDLFEEGSVTNMFTSIVGNVFGFKALRALRLEDLRIPPAYSKTFQGPPHGIQVERDKLNKYGRPLLGCTIKPKLGLSAKNYGRAVYECLRGGLDFTKDDENVNSQPFMRWRDRFLFVAEAINKSQAETGEIKGHYLNATAGTCEEMIKRAVFARELGAPIVMHDYLTGGFTANTSLAHYCRDNGLLLHIHRAMHAVIDRQRNHGIHFRVLAKALRMSGGDHIHSGTVVGKLEGEREVTLGXVDLLRDDYIEKDRSRGIYFTQDWVSMPGVLPVASGGIHVWHMPALTEIFGDDSVLQFGGGTLGHPWGNAPGAVANRVALE…	ATCG00490	Ribulose-bisphosphate carboxylases	811	0	90
496	Ribulose-1,5-bisphosphate carboxylase/oxygenase large subunit-binding protein subunit beta (RBP)	Solanum lycopersicum	460379814	MAATFTSVCSISSTSQTVEKKIINSCETLSSFSGISLTSLGGRRKNNVLKKRNDSKIQAMAKELHFNQDGSAIKKLQAGVNKLADLVGVTLGPKGRNVVLESKYGSPKIVNDGVTVAREVELEDPVENIGASLVRQAASKTNDLAGDGTTTSVVLAQGLITEGVKVVAAGANPIQIARGIDRTTKALVSELKKLSKEVEDSELADVAAVSAGNNYEVGNMIAEALSKVGRKGVVTLEEGRGSENNLFVVEGMQFDRGYISPYFVTDNEKMVAEYENCKLLLVDKKITNARDLVNVLEEAIKNGYPILVIAEDIEQEALATLVVNKLRGALKIAALKAPGFGDRKSQYLDDIAILTGGTVIREEVGLYLDQAGSEVLGNAAKVVLSKDSTTIVGDGSTQD…	AT1G55490	Chaperonin 60 beta	961	0	80
34	Ribulose-1,5-bisphosphate carboxylase/oxygenase activase (RCA)	Gossypium hirsutum	12620883	FNNTRQVPSGSFKVMAAEKEIDEETQTEKDRWKGLAYDISDDQQDITRGKGMVDSLFQAPMNDGTHYAVMSSYEYISQGLKTYNLDNNMDGFYIAPAFMDKLVVHISKNFMSLPNIKVPLILGIWGGKGQGKSFQCELVFAKMGINPIMMSAGELESGNAGEPAKLIRQRYREAADIIKKGKMCALFINDLDAGAGRMGGTTQYTVNNQMVNATLMNIADNPTNVQLPGMYNKEENPRVPIIVTGNDFSTLYAPLIRDGRMEKFYWAPTRDDRIGVCKGIFRTDGVRDEDIVKLVDTFPGQSIDFFGALRARVYDDEVRKWISEVGVASVGKKLVNSREGPPTFEQPKMTIEKLLEYGNMLVAEQENVKRVQLADKYLSEAALGEANEDSINRGTFYGK…	AT2G39730	Rubisco activase	773	0	83
184	Ribulose-1,5-bisphosphate carboxylase/oxygenase activase (RCA)	Hordeum vulgare	100614	SKANRFTVMAAENIDEKRNTDKWKGLATDISDDQQDITRGKGIVDSLFQAPTGDGTHEAVLSSYEYVSQGLRKYDFDNTMGGFYIAPAFMDKLVVHLSKNFMTLPNIKIPLILGIWGGKGQGKSFQCELVFAKMGINPIMMSAGELESGNAGEPAKLIRQRYREAADMIKKGKMCCLFINDLDAGAGRMGGTTQYTVNNQMVNATLMNIADAPTNVQLPGMYNKRENPRVPIVVTGNDFSTLYAPLIRDGRMEKFYWAPTRDDRIGVCKGIFQTDNVCDESVVKIVDTFPGQSIDFFGALRARVYDDEVRKWVGSTGIENIGKRLVNSRDGPVTFEQPKMTVEKLLEYGHMLVQEQDNVKRVQLADTYMSQAALGDANQDAMKTGSFYGKGAQQGTLPV…	AT2G39730	Rubisco activase	734	0	81
125	Ribulose-1,5-bisphosphate carboxylase/oxygenase activase (RCA)	Musa acuminata subsp. malaccensis	695062479	MAAAVSTVGAVNRVPLSLHGSSSGASVPSSAFFGSALKKANSGLSHGRVSTASFKVLAADLDESKQTSSDRWAGLASDVSDDQQDITRGKGLVDTLFQAPMGDGTHIPVMSSYEYISQGLRQYNFDNTMDGYYIAPAFMDKLVVHIAKNFMNLPNIKVPLILGIWGGKGQGKSFQCELVFAKMGINPIVMSAGELESGNAGEPAKLIRQRYREAADIIKKGKMCCLFINDLDAGAGRLGGTTQYTVNNQMVNATLMNIADNPTNVQLPGMYNKQENARVPIIVTGNDFSTLYAPLIRDGRMEKFYWAPTREDRIGVCLGIFRTDNVPMEDIVKLVDAFPGQSIDFFGALRARVYDDEVRKWVAEIGVEKVGKKLVNSLEGPPTFEQPKMTLDKLTEYGN…	AT2G39730	Rubisco activase	706	0	78
308	Transketolase (TK)	Spinacia oleracea	2529342	MAASSSLSTLSHHQTLLSHPKTHLPTTPASSLLVPTTSSKVNGVLLKSTSSSRRLRVGSASAVVRAAAVEALESTDIDQLVEKSVNTIRFLAIDAVEKANSGHPGLPMGCAPMGHILYDEIMRYNPKNPYWFNRDRFVLSAGHGCMLQYALLHLAGYDSVLEEDLKTFRQWGSRIPGHPENFETPGVEVTTGPLGQGIANAVGLALAEKHLAARFNKPDAEIVDHYTYVILGDGCQMEGIAQEACSLAGHWGLGKLIAFYDDNHISIDGDTAIAFTESVDLRFEALGWHVIWVKNGNTGYDEIRAAIKEAKTVTDKPTLIKVTTTIGFGSPNKSNSYSVHGSALGSKEVEATRQNLGWPYEPFHVPEEVKKHWSRHTPEGASLEAEWNTKFAEYEKKYP…	AT2G45290	Transketolase	1214	0	85
84	Transketolase (TK)	Solanum lycopersicum	460388792	MASSSSLTLSQAILSRSVSRHGSSSSPNSQLSPSSISLPTFSGLKSTTATSFRRRILPSAAGAGRHSAIRASAAVETLQKTDNSLVEKSVNTIRFLAIDAVEKANSGHPGLPMGCAPMGHILYDEIMRYNPKNPYWFNRDRFVLSAGHGCMLQYALLHLAGYDAVREEDLKSFRQWGSKTPGHPENFETPGVEVTTGPLGQGIANAVGLALSEKHLAARFNKPDAEIVDHYTYCILGDGCQMEGISQEAASLAGHWGLGKLIAFYDDNHISIDGDTEIAFTEDVAARYEALGWHVIWVKNGNTGYDEIRAAIKEAKAVTDKPTLIKVTTTIGFGSPNKSNSYSVHGSALGAKEVEATRQNLGWPYEPFHVPEEVKSHWSRHVPEGAALEAGWNTKFAEY…	AT2G45290	Transketolase	1222	0	78
	Carbohydrate and energy metabolism (9)
685	Unknown, pyruvate dehydrogenase E1 component subunit beta* (PDH)	Glycine max	255647166	MATLFQGLGVVNPSLSSSNSNNFLLPSRTSLSERKDGIFVVRSDARVSSKVLKARARKHELLVTNAVATKEGSSAASTSKSGHELLLFEALREGLEEEMERDPCVCVMGEDVGHYGGSYKVTKGLATKFGDLRVLDTPIAENSFTGMGIGAAMTGLRPVVEGMNMGFLLLAFNQISNNCGMLHYTSGGQFKIPIVIRGPGGVGRQLGAEHSQRLESYFQSIPGIQMVACSTPYNAKGLMKAAIRSENPVILFEHVLLYNLKERIPDEEYVLSLEEAEMVRPGEHVTILTYSRMRYHVMQAVKTLVNKGYDPEVIDIRSLKPFDLHTIGNSVKKTHRVLIVEECMRTGGIGASLTAAITENFHDYLDAPIVCLSSQDAPTPYAGTLEEWTVVQPAQIVTA…	AT1G30120	Pyruvate dehydrogenase E1 beta	611	1e-175	79
160	Malate dehydrogenase (MDH)	Arabidopsis thaliana	15219721	MAKEPVRVLVTGAAGQIGYALVPMIARGIMLGADQPVILHMLDIPPAAEALNGVKMELIDAAFPLLKGVVATTDAVEGCTGVNVAVMVGGFPRKEGMERKDVMSKNVSIYKSQAAALEKHAAPNCKVLVVANPANTNALILKEFAPSIPEKNISCLTRLDHNRALGQISERLSVPVSDVKNVIIWGNHSSSQYPDVNHAKVQTSSGEKPVRELVKDDAWLDGEFISTVQQRGAAIIKARKLSSALSAASSACDHIRDWVLGTPEGTFVSMGVYSDGSYSVPSGLIYSFPVTCRNGDWSIVQGLPIDEVSRKKMDLTAEELKEEKDLAYSCLS	AT1G04410	Lactate/malate dehydrogenase family protein	657	0	96
503	Malate dehydrogenase (MDH)	Arabidopsis thaliana	15219721	MAKEPVRVLVTGAAGQIGYALVPMIARGIMLGADQPVILHMLDIPPAAEALNGVKMELIDAAFPLLKGVVATTDAVEGCTGVNVAVMVGGFPRKEGMERKDVMSKNVSIYKSQAAALEKHAAPNCKVLVVANPANTNALILKEFAPSIPEKNISCLTRLDHNRALGQISERLSVPVSDVKNVIIWGNHSSSQYPDVNHAKVQTSSGEKPVRELVKDDAWLDGEFISTVQQRGAAIIKARKLSSALSAASSACDHIRDWVLGTPEGTFVSMGVYSDGSYSVPSGLIYSFPVTCRNGDWSIVQGLPIDEVSRKKMDLTAEELKEEKDLAYSCLS	AT1G04410	Lactate/malate dehydrogenase family protein	657	0	96
260	Malate dehydrogenase (MDH)	Arabidopsis thaliana	11133509	MAKEPVRVLVTGAAGQIGYALVPMIARGIMLGADQPVILHMLDIPPAAEALNGVKMELIDAAFPLLKGVVATTDAVEGCTGVNVAVMVGGFPRKEGMERKDVMSKNVSIYKSQAAALEKHAAPNCKVLVVANPANTNALILKEFAPSIPEKNISCLTRLDHNRALGQISERLSVPVSDVKNVIIWGNHSSSQYPDVNHAKVQTSSGEKPVRELVKDDAWLDGEFISTVQQRGAAIIKARKLSSALSAASSACDHIRDWVLGTPEGTFVSMGVYSDGSYSVPSGLIYSFPVTCRNGDWSIVQGLPIDEVSRKKMDLTAEELKEEKDLAYSCLS	AT1G04410	Lactate/malate dehydrogenase family protein	657	0	96
164	Malate dehydrogenase (MDH)	Beta vulgaris subsp. vulgaris	731361010	MGMSQLLEKIGIGWNSELVEKIGVVSICFICSYFLIKHIWGSVKMEKEPTRVLVTGAAGQIGYALVPMIARGLMLGPDQPVILHMLDIEPASEALNGVKMELIDAAFPLLKGVIATTDVGEACQDINVAIMLGGFPRKEGMERKDVMSKNVTIYKAQATALEQYAADDCKVVVVANPANTNALILKEFAPSIPERNITCLTMLDHNRALGQIAERLDVYVSDVKNVIIWGNHSATQYPDVKHAIVTSTNKEKSVRELVNDDHWLNTEFVTTIQQRGAVIIKARKLSSALSAASATCDHIRNWVLGTNKGTWISMGVCSDGSYGIEPGLIYSFPVTCKNGEWSIVQGLKVDEFSRAKMDTTEKELIEEKALAYSCLN	AT1G04410	Lactate/malate dehydrogenase family protein	506	1e-143	72
163	Malate dehydrogenase (MDH)	Brachypodium distachyon	357147942	MASAITISSVSAQAALISKPRNHGITSYSGLKASSSSISFETGSSFLGKNASLRASVTPRIVPKAKSGAQISPEASYKVAVLGAAGGIGQPLGLLIKMSPLVSELRLYDIANVKGVAADLSHCNTPSQVLDFTGPGELADCLKGADVVVIPAGVPRKPGMTRDDLFNINAGIVKSLIEAVADNCPEAFIHIISNPVNSTVPIAAEILKQKGVYNPKKLFGVSTLDVVRANTFVAQKKNLKLIDVDVPVVGGHAGITILPLLSKTRPSVTFTEEETEELTKRIQNAGTEVVEAKAGAGSATLSMAYAAARFVESSLRALAGDPDVYECTYVQSELTELPFFASRVKLGKNGVESIISSDLEGVTEYEAKALEALKPELKGSIEKGIEFVHKQQGATASV	AT3G47520	Malate dehydrogenase	535	1e-152	79
486	Enolase	Tarenaya hassleriana	729317446	MASTAKTYLQTTFLSPQRVPRHRLSASSPCLRFRRREIQCSVAAREYRVKGLKARQIIDSRGNPTVEVDLITDDLYRSAVPSGASTGIYEALELRDGDKSVYGGKGVLTAVKNINEVLGPKLVGVDVRNQAHVDALMLELDGTPNKSKLGANATLGVSLSVCRAGAGAKGLPLYKHIQELSGTDELVMPVPAFNVINGGSHAGNNLAMQEFMILPVGATSFSEALQMGSEVYHTLKGIIKAKYGQDACNVGDEGGFAPNVQDNREGLVLLMDAIEKAGYTGKIKIGMDVAASEFFMKDGRYDLNFKNQPNDGAHVLSAQSLAELYKEFVKDFPIVSIEDPFDQDDWSAWASLLSSVDIQLVGDDLLVTNPKRIAEAIQKKSCNALLLKVNQIGTVTESI…	AT2G36530	Enolase	597	1e-171	68
489	6-phosphogluconate dehydrogenase (6-PGDH)	Glycine max	356513305	MESAALSRIGLAGLAVMGQNLALNIAEKGFPISVYNRTASKVDQTVDRARNEGSLPLTGQYTPRDFVLSLQRPRSVIILVKAGSPVDHTIAALSDHLDPGDCIIDGGNEWYENTERRMNLVADKGLLYLGMGVSGGEDGARHGPSLMPGGSHHAYSNVQDILHKIAAQVEDGPCVTYIGEGGSGNFVKMVHNGIEYGDMQLISEAYDVLKHVGGLSNSELAEIFVEWNRGELESFLIEITADIFKVKDEDGEGFLVDKILDKTGMKGTGKWTVQQAAELSIAAPTIAASLDCRYLSGLKEERESAAAVLKEAGLSDELGRVNVSGVDKKRLIDDVRQALYASKICSYAQGMNLLRAKSNEKGWNLNLGELARIWKGGCIIRAVFLDRIKKAYQRNPNLA…	AT3G02360	6-phosphogluconate dehydrogenase family protein	757	0	74
192	Fructokinase (FK)	Lycopersicon esculentum	23476263	MACCFPVILDRSMRSSFKLSKSSSSSKLDKSKSSICSPTSLSTKKKSIQENDNLVVCFGELLIDFVPTVSGVSLAEAPGFKKAPGGAPANVAVGIARLGGSSAFIGKVGADEFGYMLADILKQNNVDNSGMRFDTHARTALAFVTLKSDGEREFMFFRNPSADMLLTEAELDKNLIQKARIFHYGSISLIAEPCRSAHLAAMETAKNAGCILSYDPNLRLPLWPSEEAAREGILSIWDQADIIKVSEDEITFLTNGEDAYDDNVVMTKLFHSNLKLLLVTEGGDGCRYYTNNFHGRVSGVKVAAVDTTGAGDAFVGGLLNSMASDPDIYMDEKKLRDALLFANGCGAITVTEKGAIPALPTKEAVLKILDGATAN	AT5G51830	PfkB-like carbohydrate kinase family protein	488	1e-138	73
	Other metabolisms (5)
135	Enoyl-acyl carrier protein reductase (EAR)	Oryza sativa subsp. japonica	75225229	MGASAATGMQMVAARPCISASQGMLTSRAAVSRIGRALSTTTGFATCPRICYSSPLGSSKRSGVAIRAMSSESGPQGLPIDLRGKRAFIAGVADDNGYGWAIAKALAAAGAEILVGTWVPALNIFETSLRRGKFDESRKLPDGSLMEIVKVYPLDAVYDSPEDVPEDVKGNKRYAGSSNWTVKEVAESVKNDFGSIDILVHSLANGPEVTKPLLETSRRGYLAALSASSYSFVSLLQHFLPIMNPGGASISLTYIASERAIPGYGGGMSSAKAALESDTKVLAFEAGRKGKIRVNTISAGPLGSRAAKAIGFIEKMIEYSYVNAPLQKELLADEVGNTAAFLVSPLASAITGSTVYVDNGLNTMGLAVDSPTISS	AT2G05990	NAD(P)-binding Rossmann-fold superfamily protein	499	1e-141	67
197	Hypothetical protein PHAVU_001G035500g, glycine decarboxylase* (GDC)	Phaseolus vulgaris	593795946	MERARRLANRAILKRLVSEAKQHQKNESVLHSSTTPMLLYSSSRCMSSVSSPALRNRGSKTDTLLGRSMNIATMSRGVVGGFLGVGSTRSISVEALQASDTFPRRHNSATPEEQSKMAESCGFESIDSLVDATVPKSIRLKEMKFGKFDGGLTESQMIEHMKELASKNKVFKSYIGMGYYNTHVPPVILRNIMENPAWYTQYTPYQAEISQGRLESLLNYQTMITDLTGLPMSNASLLDEGTAAAEAMSMCNHIQKGKKKTFIIASNCHPQTIDICKTRAAGFDLKVVTADLKDIDYKSGDVCGVLVQYPGTEGEVLDYGEFIKKAHAHEVKVVMASDLLALTVLKPPGEFGADIVVGSAQRFGVPMGYGGPHAAFLATSQEYKRMMPGRIIGVSVDSS…	AT2G26080	Glycine decarboxylase P-protein 2	1776	0	80
362	3-isopropylmalate dehydrogenase (IPMDH)	Arabidopsis thaliana	15241338	MAAFLQTNISLNAIKIVPGKYSSLTDHQFRAPYRIRCAAASPGKKRYNIALLPGDGIGPEVISVAKNVLQKAGSLEGLEFDFKEMPVGGAALDLVGVPLPEETFTAAKLSDAILLGAIGGYKWDKNEKHLRPEMALFYLRRDLKVFANLRPATVLPQLVDASTLKKEVAEGVDMMIVRELTGGIYFGEPRGITINENGEEVGVSTEIYAAHEIDRIARVAFETARKRRGKLCSVDKANVLDASILWRKRVTALASEYPDVELSHMYVDNAAMQLIRDPKQFDTIVTNNIFGDILSDEASMITGSIGMLPSASLGESGPGLFEPIHGSAPDIAGQDKANPLATILSAAMLLKYGLGEEKAAKRIEDAVVDALNKGFRTGDIYSPGNKLVGCKEMGEEVLK…	AT5G14200	Isopropylmalate dehydrogenase 1	832	0	100
445	Hypothetical protein SELMODRAFT_406755, containing cd00517 ATP-sulfurylase domain* (ATPS)	Selaginella moellendorffii	302763978	MAPLATLYGRDVTFAAPYRPSPPAPSQALISWQERVEAPAASHFFAGLQQSTRLSARFAASDRRIPRERDVTPRVAEIDRVLEVNGAFLGASAKPAAAELIEPDGGTLVDLLVPDSKAAEKESEARGLVQVKIGQIDLEWIHVVSEGWASPLKGFMRQAEYLQALHFNSLRMPNGLLANMSIPIVLAIDDEQKESIGNASSVTLVGPQGDMVAILSNIEIYKHNKEERIARTWGTTAPGLPYVDESITNAGNWLIGGDLEVLKRVKYNDGLDHYRLSPMELRAEFARRKADAVFAFQLRNPVHNGHALLMTDTRRRLLEMGYKNPILLLHPLGGFTKADDVPLEWRMRQHDEVLKAGVLDPETTVVAIFPSPMHYAGPTEVQWHAKARINAGANFYIVG…	AT1G19920	Pseudouridine synthase/archaeosine transglycosylase-like family protein	672	0	72
190	Predicted protein, pyridoxal biosynthesis protein PDX1*	Physcomitrella patens	168019502	MEGNGVVAVYHNNGSGLSENQNKKTVSYAVKVGLAQMLRGGVIMDVVDAAQARIAEEAGAVAVMALERVPADIRAEGGVARMSDPSMIKEIKKAVTIPVMAKARIGHFVEAQILEAIGVDYIDESEVLTPADDVNHINKHNYRIPFVCGCRNLGEALRRIAEGAAMIRTKGEAGTGNVVEAVRHTRSVLGDIRRLQSLDDDEVFTFAKEIQAPYELVRQTKQLGRLPVVNFAAGGVATPADAALMMQLGCDGVFVGSGIFKSGDPAKRARAIVEAVTHYRDAHVLADVSENLGEAMVGINLSDKKVERFAARSE	AT5G01410	Aldolase-type TIM barrel family protein	456	1e-129	73
	Signaling and vesicle trafficking (8)
282	Unknown, containing PLN02804 chalcone isomerase domain* (CHI)	Picea sitchensis	116784316	MASEVVMVDEFQFPKSIAPTASKALHLVGYGITDMEIHFLQIKFTAIGIYLNAEVASHLQGWKGKSGAEILADDDFFDSLCGAPVDKFIRVVVIKELKGAQYGLQLENAVRDRLAAIDKFEEEEEEALEKLVEFFQGKYLKKNSLITYHFSASTKTVEVSFLAEGKEENKLAKTVVENENVAAMIKKWYLGGSSAVSQNTVKTLADGMAALLKQ	AT5G05270	Chalcone-flavanone isomerase family protein	223	9e-59	53
1063	Hypothetical protein SELMODRAFT_151778, containing cd00200 WD40 domain* (WD40)	Selaginella moellendorffii	302791020	MEKRKAQVPLVCHGHSRPIVDLFYSPVTADGFFLISASKDGKPMLRNGGTGDWIGTFEGHKGAVWAACLDTPALRAATASADFSARVWDALTGDELYSFEHKHIVRTCAFSESTTLLLTGGQEKILRIYDLERPDAAPTEMEGLTSTIRSAVWHHSDQTILSSCNDTGSVRLWDVRTKTTVRQLETKSPCTSVEVSRDGRYITTADGNSVKFWDANHFGMVKSFTMARPMESASLYPALGKFVAGGDDMWVRVFDFYTGEEIECCKGHHGPVHCVRFSPGGESFASGSEDGTIRIWQTGESGGGGGGGGGAGGAEESGSAPPKITVSAEDVARKVEGFHIEL	AT3G15610	Transducin/WD40 repeat-like superfamily protein	459	1e-129	68
207	14-3-3 protein	Spinacia oleracea	440573600	MASSAREESVYMAKLAEQAERYEEMVEFMEKVVSASSEGEELTVEERNLLSVAYKNVVGARRASWRIISSIEQKEESRGNEDHVSVIRDYRSRIEKELSDNCDGILKLLDTKLVPAASSGDSKVFYLKMKGDYHRYLAEFKTGAQRKEAAESTLTAYKAAQDIANAELAPTHPIRLGLALNFSVFYYEILNSPDRACNLAKQAFVEAIAELDTLGEDSYKDSTLIMQLLRDNLTLWTSDMQDEAADEITEEAAKQQKAVNNNKIAY	AT5G38480	General regulatory factor 3	410	1e-115	83
276	Unknown, containing cd00877 Ran GTPase domain* (RAN)	Picea sitchensis	116794384	MALPGQQADCPSFKLVIVGDGGTGKTTFVKRHLTGEFEKKYEPTIGVEVHPLDFFTNCGKIRFYCWDTAGQEKFGGLRDGYYIHGQCAIIMFDVTARLTYKNVPTWHRDLCRVCENIPIVLCGNKVDVKNRQVKAKQVTFHRKKNLQYYEISAKSNYNFEKPYLYLARKLSGDPNLHFVESPALAPPEVQIDMATQLQYEADLAAAAAQPLPDDDDDAFDN	AT5G55190	RAN GTPase 3	399	1e-111	94
317	GTP-binding nuclear protein Ran/TC4 (RAN)	Vicia faba	585783	MALPNQQTVDYPSFKLVIVGDGGTGKTTFVKRHLTGEFEKKYEPTIGVEVHPLDFFTNCGKIRFYCWDTAGQEKFGGLRDGYYIHGQCAIIMFDVTARLTYKNVPTWHRDLCRVCENIPIVLCGNKVDVKNRQVKAKQVTFHRKKNLQYYEISAKSNYNFEKPFLYLARKLAGDANLHFVESPALAPPEVQIDIALQQRHENEILEAANQPLPDDDDDAFE	AT5G55190	RAN GTPase 3	449	1e-125	95
340	Unknown, containing cd00877 Ran GTPase domain* (RAN)	Picea sitchensis	116794384	MALPGQQADCPSFKLVIVGDGGTGKTTFVKRHLTGEFEKKYEPTIGVEVHPLDFFTNCGKIRFYCWDTAGQEKFGGLRDGYYIHGQCAIIMFDVTARLTYKNVPTWHRDLCRVCENIPIVLCGNKVDVKNRQVKAKQVTFHRKKNLQYYEISAKSNYNFEKPYLYLARKLSGDPNLHFVESPALAPPEVQIDMATQLQYEADLAAAAAQPLPDDDDDAFDN	AT5G55190	RAN GTPase 3	399	1e-111	94
764	Unknown, containing cd00877 Ran GTPase domain* (RAN)	Picea sitchensis	116794384	MALPGQQADCPSFKLVIVGDGGTGKTTFVKRHLTGEFEKKYEPTIGVEVHPLDFFTNCGKIRFYCWDTAGQEKFGGLRDGYYIHGQCAIIMFDVTARLTYKNVPTWHRDLCRVCENIPIVLCGNKVDVKNRQVKAKQVTFHRKKNLQYYEISAKSNYNFEKPYLYLARKLSGDPNLHFVESPALAPPEVQIDMATQLQYEADLAAAAAQPLPDDDDDAFDN	AT5G55190	RAN GTPase 3	399	1e-111	94
123	ADP-ribosylation factor (ARF)	Chlamydomonas reinhardtii	1703374	MGLRFTKALSRLFGKKEMRILMVGLDAAGKTTILYKLKLGEIVTTIPTIGFNVETVEYKNISFTVWDVGGQDKIRPLWRHYFQNTQGLIFVVDSNDRERVVEARDELHRMLNEDELRDAVLLVFANKQDLPNAMNAAEITDKLGLHSLRQRHWYIQSTCATSGEGLYEGLDWLSNNLANKT	AT5G14670	ADP-ribosylation factor A1B	360	1e-100	96
	Cell structure (5)
397	Os03g0718100, actin*	Oryza sativa subsp. japonica	115454971	MADAEDIQPLVCDNGTGMVKAGFAGDDAPRAVFPSIVGRPRHTGVMVGMGQKDAYVGDEAQSKRGILTLKYPIEHGIVSNWDDMEKIWHHTFYNELRVAPEEHPVLLTEAPLNPKANREKMTQIMFETFNTPAMYVAIQAVLSLYASGRTTGIVLDSGDGVSHTVPIYEGYALPHAILRLDLAGRDLTDYLMKILTERGYSFTTTAEREIVRDMKEKLSYIALDYDQEMETAKTSSSVEKSYELPDGQVITIGAERFRCPEVLFQPSFIGMEAAGIHETTYNSIMKCDVDIRKDLYGNIVLSGGTTMFPGIADRMSKEITALAPSSMKIKVVAPPERKYSVWIGGSILASLSTFQQMWIAKAEYDESGPSIVHRKCF	AT5G09810	Actin 7	759	0	95
554	Reversibly glycosylated polypeptide (RGP)	Ricinus communis	223546230	MADFAAISPTPLLKDELDIVIPTIRNLDFLEMWRPFFQPYHLIIVQDGDPSKIIKVPEGFDYELYNRNDINRILGPKASCISFKDSACRCFGYMVSKKKYIYTIDDDCFVAKDPSGKDINALEQHIKNLLCPSTPFFFNTLYDPYRTGADFVRGYPFSLREGVPTAVSHGLWLNIPDYDAPTQLVKPLERNTRYVDAVMTIPKGTLFPMCGMNLAFNRELIGPAMYFGLMGDGQPIGRYDDMWAGWCTKVICDHLGFGVKTGLPYIYHSKASNPFVNLKKEYKGIYWQEELIPFFQSAVLPKECTTVQKCYIELSKQVRAKLGKIDEYFVKLADAMVTWVEAWDELNPSGNSGELPNGAAK	AT3G08900	Reversibly glycosylated polypeptide 3	650	0	84
118	Reversibly glycosylated polypeptide (RGP)	Solanum tuberosum	34582499	MAGSSVTPTPLLKDELDIVIPTIRNLDFLEMWRPFFQPYHLIIVQDGDPSKIINVPEGFDYELYNRNDINRILGPKASCISFKDSACRCFGYMVSKKKYIYTIDDDCFVAKDPSGKDINALEQHIKNLLCPSTPHFFNTLYDPYREGADFVRGYPFSMREGAATAVSHGLWLNIPDYDAPTQLVKPRERNTRYVDAVMTIPKGTLFPMCGMNLAFDRELIGPAMYFGLMGDGQPIGRYDDMWAGWCIKVICDHLGLGVKTGLPYIWHSKASNPFVNLKKEYKGIYWQEEIIPFSQSATLPKDCTSVQQCYLELSKQVKEKLSTIDPYFTKLADAMVTWIEAWDELNPTGEGLAKLPSRTAPESRLH	AT5G15650	Reversibly glycosylated polypeptide 2	664	0	90
299	Unknown protein, rhamnose biosynthetic enzyme 1* (RBE)	Arabidopsis thaliana	8493590	MVADANGSSSSSFNFLIYGKTGWIGGLLGKLCEAQGITYTYGSGRLQDRQSIVADIESVKPSHVFNAAGVTGRPNVDWCESHKVETIRTNVAGTLTLADICREKGLVLINYATGCIFEYDSGHPLGSGIGFKEEDTPNFTGSFYSKTKAMVEELLKNYENVCTLRVRMPISSDLTNPRNFITKIARYEKVVDIPNSMTILDELLPISIEMAKRNLTGIYNFTNPGVVSHNEILEMYRDYIDPSFTWKNFTLEEQAKVIVAPRSNNELDATKLKTEFPELMSIKESLIKFVFEPNKKTEVKA	AT1G63000	Nucleotide-rhamnose synthase/epimerase-reductase	624	1e-179	100
482	Caffeoyl-CoA O-methyltransferase (CCoAOMT)	Eucalyptus gunnii	3023419	MATAGEESQTQAGRHQEVGHKSLLQSDALYQYILETSVYPREPEPMKELREITAKHPWNIMTTSADEGQFLNMLLKLINAKNTMEIGVFTGYSLLATALALPDDGKILAMDINRENYELGLPVIQKAGVADKIDFREGPALPILDQLIEDGKQGSFDFIFVDADKDNYLNYHKRLIELVKVGGLIGYDNTLWNGSVVAPPDAPLRKYVRYYRDFVLELNKALAADPRIEICMLPVGDGITLCRRIQLSI	AT4G34050	S-adenosyl-L-methionine-dependent methyltransferases superfamily protein	446	1e-126	85
	Cell cycle (2)
104	Cell division cycle protein 48 homolog (CDC48)	Tarenaya hassleriana	729396339	MANQAESSDSKGTKRDFSTAILERKKAPNRLVVDEAISDDNSVVSLHPETMEKLQLFRGDTVLIKGKKRKDTVCIALADDTCEEPKIRMNKVVRSNLRVRLGDVISVHQCPDVKYGKRVHILPIDDTIEGVTGNLFDAYLKPYFLEAYRPVRKGDLFLVRGGMRSVEFKVIETDPPEYCVVAPDTEIFCEGEPIKREDEDRLDEVGYDDVGGVRKQMAQIRELVELPLRHPQLFKSIGVKPPKGILLYGPPGSGKTLIARAVANETGAFFFCINGPEIMSKLAGESESNLRKAFEEAEKNAPSIIFIDELDSIAPKREKTHGEVERRIVSQLLTLMDGLKARSHVIVIGATNRPNSIDPALRRFGRFDREIDIGVPDEVGRLEVLRIHTKNMKLAEDVD…	AT5G03340	ATPase, AAA-type, CDC48 protein	1389	0	87
139	Proliferation-associated protein 2G4-like (PA2G4)	Nicotiana tomentosiformis	697180533	MSDDEREEKELDLTSPEVVTKYKGAAEIVNKALQLVVSECKPKSKIVDLCEKGDAFIKEQTGNMYKNVKKKIERGVAFPTCISVNNTVCHFSPLSSDETVLEEGDIVKIDMGCHIDGFIAVVGHTHVLQEGPVTGRAADVVAAANTAAEVALRLVRPGRKNSDVTEAIQKVAAAYDCKIVEGVLSHQMKQFVIDGNKVVLSVSNPETRVDDAEFEENEVYSIDIVTSTGEGKPKLLDEKQTTIYKRAVDKSYNLKMKASRFIFSEISQKFPVMPFTARDLEEKRARLGLVECVNHELLQPYPVLHEKPGDLVAHIKFTVLLMPNGSDRITTHALQELKPTKTVDEEPEIKTWLALPVKTKKKGGGKKKKAKKGEKTEDSSQAEPMEGESNGAES	AT3G51800	Metallopeptidase M24 family protein	587	1e-168	74
	Transcription related (1)
938	Predicted protein, containing cd00771 threonyl-tRNA synthetase class II core catalytic domain* (ThrRS)	Physcomitrella patens	168012416	MSIASSAAEQQTTISAESEVKIVEEEKKPIVLPTNESSEKLLKIRHTSAHVLAMAVQKLFPDAQVTIGPWIEKGFYYDFDKEEPFTETDLKKIKKEMDRIISRNLPLTREEVAKEEAEKRIKAINEPYKLEILEGIKTEPITIYKIGEEWWDLCAGPHLERTGQLDKRAIELEFVAGAYWRGDEKKQMLQRIYGTAWESEEQLKAYQVQKEEAKRRDHRRLGQDLNLFSIQEDAGGGLVFWHPKGSMVRHIIEDYWKKMHFANGYELLYTPHIAKLDLWKTSGHYEFYKENMFDQMRIEEELYQIRPMNCPFHIQVYKDSLRSYRELPMRVAELGTVYRYERSGALHGLFRVRGFTQDDGHIFCLPDQIRDEIRGVLDLTEIVLKQFGFTKFEINLSTK…	AT2G04842	Threonyl-tRNA synthetase, putative /threonine--tRNA ligase, putative	915	0	72
	Protein synthesis (10)
83	Predicted protein, 40S ribosomal protein SA (RPSA)	Physcomitrella patens	168017628	MKESDVQMMLAADVHLGTKNCDFQMERYVWKRRSDGIFIINVGKTYEKLELAARVIAAIENPQDIIVQSARPYGQRAVLKFAQYTGCQAIAGRHTPGTFTNQLQNTFSEPRLLILTDPRTDHQPIMEAALGNIPVIAFCDTDSPMKYVDIAIPANNKGKHSIGALFWLLARMVLQMRGTISAAHPWDVMVDLFFYREPDEGKDREEEEGGAAEFAAVEYAAPTLALGGDAQWGPEAAEAGQWETDAAAGAVPAGAPAGWDVGAAAAPVAPAGWDPAAPAEAPVAPAGWEPAA	AT3G04770	40s ribosomal protein SA B	367	1e-102	84
454	Hypothetical protein AMTR_s00087p00135370, containing cd08065 eukaryotic translation initiation factor 3* (eIF3)	Amborella trichopoda	548842775	MANNMVRSFRDIAATQEVASPLRVVQIDGLVILKIIKHCKEFMPSLVTGQLLGLDVGSCLEVTNCFPFPSREEDEEIEADGANYQLEMMRCLREVNVDNNTVGWYQSTYMGSFQTVELIETFMNYQENIKRCVCIIYDPQRSSQGVLALKALKLSDSFMDLYRYNNFSGEKLREKNLSWVDIFEEIPVKVSNSALVSAFMTELEADAPVSQCDYDRLVLSTNPFMERNLEFLVECMDDLSMEQQKFQFYYRNLSRQQAQQQAWLQKRRAENKARKDAGEDPLPEEDPSNPIFKPVPEPSRLDSFLITNQISNYCNQINGYILYRWVYTLSLPIKGHVYVCRFMYGDEKTCPFVRACFRPVTKKDSEHWRSQQDRKIGML	AT1G10840	Translation initiation factor 3 subunit H1	513	1e-146	77
66	Predicted protein, eukaryotic initiation factor 4A (eIF4A)*	Physcomitrella patens	168026095	MAGSAPEGSQFDARQYDAKMETILGGEGEDFISTWEEVHETFDVMGLHENLLRGIYAYGFEKPSAIQQRGIVPFTKGLDVIQQAQSGTGKTATFCSGILQQLDYQLLECQALVLAPTRELAQQIEKVMRALGDYLQVKVHACVGGTSVREDQRILQAGVHVVVGTPGRVYDMLRRNALRADSIKCFVLDEADEMLSRGFKDQIYDIFQLLPQKLQVGVFSATMPPEALEITRKFMNKPVKILVKRDELTLEGIKQFYVNVDREEWKLDTLCDLYETLAITQSVIFINTRRKVDWLTDKMRARDHTVSATHGDMDQNTRDIIMREFRSGSSRVLITTDLLARGIDVQQVSLVINYDLPTQPENYLHRIGRSGRFGRKGVAINFVTKEDERMLQDIQRFYN…	AT3G13920	Eukaryotic translation initiation factor 4A1	766	0	88
878	Eukaryotic initiation factor 4A (eIF4A)	Nicotiana tabacum	1170511	MAGLAPEGSQFDARQYDAKMTELLGTEQEEFFTSYDEVYDSFDAMGLQENLLRGIYAYGFEKPSAIQQRGIVPFCKGLDVIQQAQSGTGKTATFCSGVLQQLDYSLVECQALVLAPTRELAQQIEKVMRALGDYLGVKVHACVGGTSVREDQRILQSGVHVVVGTPGRVFDMLRRQSLRPDHIKMFVLDEADEMLSRGFKDQIYDIFQLLPPKIQVGVFSATMPPEALEITRKFMNKPVRILVKRDDVTLEGIKQFYVNVDKEEWKLETLCDLYETLAITQSVIFVNTRRKVDWLTDKMRSRDHTVSATHGDMDQNTRDIIMREFRSGSSRVLITTDLLARGIDVQQVSLVINYDLPTQPENYLHRIGRSGRFGRKGVAINFVTKDDERMLSDIQKFYN…	AT3G13920	Eukaryotic translation initiation factor 4A1	797	0	92
94	OSJNBa0020P07.3, elongation factor 2* (EF2)	Oryza sativa subsp. japonica	38344860	MVKFTVEELRRIMDKKNNIRNMSVIAHVDHGKSTLTDSLVAAAGIIAQEVAGDVRMTDTRADEAERGITIKSTGISLFYEMSDESLKLYKGERDGNEYLINLIDSPGHVDFSSEVTAALRITDGALVVVDCIEGVCVQTETVLRQALGERIRPVLTVNKMDRCFLELQVEGEEAYQTFSRVIENANVIMATYEDTLLGDVQVYPEKGTVAFSAGLHGWAFTLSSFAKMYASKFGVDESKMMERLWGENFFDPATKKWTNKSTGSATCKRGFVQFCYEPIKQIINTCMNDQKDKLWPMLQKLGVVMKADEKDLMGKALMKRVMQTWLPASNALLEMMIYHLPSPSKAQKYRVENLYEGPLDDVYATAIRNCDPEGPLMLYVSKMIPASDKGRFFAFGRVF…	AT1G56070	Ribosomal protein S5/Elongation factor G/III/V family protein	1618	0	91
538	Hypothetical protein SELMODRAFT_411087, elongation factor 2* (EF2)	Selaginella moellendorffii	302773640	MVKFTAEELRRIMDKKHNIRNMSVIAHVDHGKSTLTDSLVAAAGIIAQEVAGDVRMTDTRQDEAERGITIKSTGISLYYEMSEESLKAFKGERDGYEYLINLIDSPGHVDFSSEVTAALRITDGALVVVDCVEGVCVQTETVLRQALGERIRPVLTVNKMDRCFLELQVDGEEAYQTFQRVIENANVIMATYEDALLGDVQVYPEKGTVAFSAGLHGWAFTLTNFAKMYASKFNVDEKKMMERLWGENFFDPATKKWTSKNTGSPTCVRGFVQFIYNPIKQIIAICMNDQKDKLWPMLQKLNVTLKNEDKELVGKPLMKRVMQTWLPASDALLEMMVYHLPSPAKAQRYRVENLYEGPLDDKYAAAIRNCDPEGPLMLYVSKMIPASDKGRFFAFGRVF…	AT1G56070	Ribosomal protein S5/Elongation factor G/III/V family protein	1521	0	85
510	Hypothetical protein SELMODRAFT_143627, elongation factor G* (EF-G)	Selaginella moellendorffii	302765284	MAHIDAGKTTTTERILYYTGKNYKIGEVHEGNATMDWMEQERERGITITSAATTAVWKNHRINIIDTPGHVDFTLEVERALRVLDGAICLFDSVAGVEPQSETVWRQADKYGVPRICFVNKMDRMGANFFRTRDMIVSNLGAKPLVLQLPIGAEDTFKGVVDLITMKAILWSGEQLGAKFSYEEIPDNLAKDAKDYRAQLVELVVEQDGEVMEQYLEGVEPDEATIKRLIRQGTISNSFVPVLCGSAFKNKGVQPLLDAVIEFLPSPVELPSIKGTDMDDPEVVLERKPCDKEPFSGLAFKVMTDPFVGALTFMRVYSGVLTAGSYALNANKNKKERIGRLLQMHANSREDVKVAVTGDIVALAGLKDTITGETLCDPEKPVILERMDFPDPVIKVAIE…	AT1G62750	Translation elongation factor EFG/EF2 protein	1188	0	82
942	Elongation factor Tu (EF-Tu)	Setaria italica	514812465	MASAAVLRNAGSRRLFSYPTLRATTISAPAALPDAPAAAAPAQPPPMAGTLWARAMATFTRTKPHVNVGTIGHVDHGKTTLTAAITKVLAEAGKAKAIAFDEIDKAPEEKARGITISTAHVEYETAKRHYAHVDCPGHADYVKNMITGAAQMDGGILVVSAPDGPMPQTKEHILLARQVGVPSLVCFLNKVDAVDDPELLELVEMELRELLTFYKFPGDDIPIIRGSALSALQGTNDEIGKNAILKLMDAVDEYIPDPVRQLDKPFLMPIEDVFSIQGRGTVVTGRVEQGTIKTGEDVEILGLTQSGPLKTTVTGVEMFKKILDHGEAGDNVGLLLRGLKRGDVERGQVVCKPGTLKTCTKFEAEIYALTKDEGGRHTAFMSNYSPQFYFRTADVTGKI…	AT4G02930	GTP binding Elongation factor Tu family protein	688	0	75
205	Uncharacterized protein LOC105056625, containing cd14275 elongation factor Ts domain* (EF-Ts)	Elaeis guineensis	743840139	MVPVINCSVGNITLLPGSTCGLRKEIQSTRCHVSGKYLRPTPLSQGFLFTKMSLRLFQRNYRGYVSKHGSRVRIFAAVGADITIEEPDPAVSDEVADETSETAASSAETNEPAPANPAVTSTAKSKRPRPVRKSEMPPVKDEELVPGASFKGKVRSIQPFGAFVDFGAFTNGLVHVSRLSDEYVKDVASFVSVGQEVTVRIVEVNKESGRISLTMRDTDEPRKIQQRRDTPADGSNNKPRAARKNAARSNQKDGAVQKISKFVKGQNLVGTVKNITRSGAFVSLPAGEEGFLPISEESEGFGGILGNSSLQVGQEVKVRVLRVTRGQVTLTMKKEEDVERLNIQLNQGVVHVATNPFELAFRKNKEIAAFLDERERDRNSSENLSMSKTLEQAGGDDDE…	AT4G29060	Elongation factor Ts family protein	701	0	80
625	Tyrosine phosphorylated protein A (TypA)	Suaeda salsa	162424768	MESAITIFNHTSLAFSLSRNPISSSKNAPKLSSLLPNQLLKCTTLSSSSTSLTKKIAVSHVHHRSIQCSAAGTAAATPSEKKGQLMRRNDIRNIAIVAHVDHGKTTLVDSMLKQAKVFRDNQTVQERIMDSNDLERERGITILSKNTSIGYKDTKINIIDTPGHSDFGGEVERILNMVEGVLLVVDSVEGPMPQTRFVLKKALEFGLAVVVVVNKIDRPSARPDFVINSTFELFIELNATDEQCDFQVVYASGIKGKAGLTPEKLADDLGPLFESVIRCIPGPQIEKDGALQMLVTNIEYDEHKGRIGIGRLHAGVLERGKDVKVCTTEDACRYARVSELFVYEKFLRAPVDTVEAGDICAVCGIGDIQIGETIADKALGKPLPAIKVEEPTVKMSFSI…	AT5G13650	Elongation factor family protein	1099	0	82
	Protein folding and processing (8)
542	Hypothetical protein SELMODRAFT_440382, containing pfam00012 heat shock protein 70 domain* (HSP70)	Selaginella moellendorffii	302770212	MAKEGPAVGIDLGTTYSCVGVWQHDRVEIIANDQGNRTTPSYVAFTDTERLIGDAAKNQVAMNPVNTVFDAKRLIGRRFSDSSVQSDMKLWPFKVTAGAAEKPMITVTYKGEEKTFAAEEISSMVLNKMKEIAEAFLGATVKNAVITVPAYFNDSQRQATKDAGVISGMNVMRIINEPTAAAIAYGLDKKATSAGEKNVLIFDLGGGTFDVSLLTIEEGIFEVKATAGDTHLGGEDFDNRMVNHFVQEFKRKYKKDISGNPRALRRLRTACERAKRTLSSTAQTTIEIDSLFDGIDFNTTITRARFEELNMDLFRKCMEPVEKCLRDAKMDKSSIHDVVLVGGSTRIPKVQQLLQDFFNGKELCKSINPDEAVAYGAAVQAAILSGEGNEKVQDLLLLD…	AT3G12580	Heat shock protein 70	1159	0	87
1002	Heat shock protein 70 (HSP70)	Populus trichocarpa	224098390	MAGKGEGPAIGIDLGTTYSCVGVWQHDRVEIIANDQGNRTTPSYVAFTDTERLIGDAAKNQVAMNPVNTVFDAKRLIGRRFSDPSVQSDVKLWPFKVIAGPGDKPMIVVTYKGEEKQFAAEEISSMVLIKMREIAEAYLGTTIKNAVVTVPAYFNDSQRQATKDAGVIAGLNVMRIINEPTAAAIAYGLDKKATSVGEKNVLIFDLGGGTFDVSLLTIEEGIFEVKATAGDTHLGGEDFDNRMVNHFVQEFKRKNKKDISGNPRALRRLRTACERAKRTLSSTAQTTIEIDSLYEGIDFYSSITRARFEEMNMDLFRKCMEPVEKCLRDAKMDKSTVHDVVLVGGSTRIPKVQQLLQDFFNGKELCKSINPDEAVAYGASVQAAILSGEGNEKVQDLLL…	AT3G12580	Heat shock protein 70	1159	0	87
1566	Heat shock protein 70 (HSP70)	Petunia × hybrida	20559	EGPAIGIDLGTTYSCVGVWQHDRVEIIANDQGNRTTPSYVGFTDTERLIGDAAKNQVAMNPINTVFDAKRLIGRRFSDPSVQSDIKLWPFKVIPGPGDKPMIVVTYKGEEKQFAAEEISSMVLTKMKEIAEAYLGTTIKNAVVTVPAYFNDSQRQATKDAGVIAGLNVMRIINEPTAAAIAYGLDKKASSAGEKNVLIFDLGGGTFDVSLLTIEEGIFEVKATAGDTHLGGEDFDNRMVNHFVQEFKRKNKKDISGNPRALRRLRTACERAKRTLSSTAQTTIEIDSLYEGIDFYSTITRARFEELNMDLFRKCMEPVEKCLRDAKMDKSSVHDVVLVGGSTRIPKVQQLLQDFFNGKELCKSINPDEAVAYGAAVQAAILSGEGNEKVQDLLLLDVTP…	AT3G12580	Heat shock protein 70	1143	0	86
314	Heat shock protein 70 (HSP70)	Dactylis glomerata	188011548	MAKKGGEGPAIGIDLGTTYSCVGVWQHDRVEIIANDQGNRTTPSYVGFTDTERLIGDAAKNQVAMNPTNTVFDAKRLIGRRFSDPSVQSDMKLWPFKVIPGPADKPMIVVQYKGEEKQFAAEEISSMVLIKMKEIGEAYLGTTIKNAVVTVPAYFNDSQRQATKDAGVIAGLNVMRIINEPTAAAIAYGLDKKASSSGEKNVLIFDLGGGTFDVSLLTIEEGIFEVKATAGDTHLGGEDFDNRMVNHFVQEFKRKNKKDISGNPRALRRLRTACERAKRTLSSTAQTTIEIDSLYEGIDFYSTITRARFEEMNMDLFRKCMEPVEKCLRDAKMDKSTVHDVVLVGGSTRIPKVQQLLQDFFNGKELCKSINPDEAVAYGAAVQAAILSGEGNEKVQDLL…	AT5G02490	Heat shock protein 70 (Hsp 70) family protein	1098	0	82
928	Heat shock protein 70 like protein (HSP70)	Solanum lycopersicum	460394037	MSTTSSDKEGKGIGIDLGTTYSCVGVWLNDRVEIIPNDQGNRTTPSYVAFTDTERLIGDAAKNQVAMNPHNTVFDAKRLIGRRYTDPSVQSDIKLWPFKVYSGPGDKPMIEVTYKGEKKQFSAEEISSMVLVKMRETAESFLGFKVKNAVVTVPAYFNDSQRQATKDAGAISGMNVLRIINEPTAAAIAYGLDKKASRKGEQNVLVFDLGGGTFDVSILTIEEGIFEVKATAGDTHLGGEDFDNRLVNHFVTEFRRKHKKDLSGNARALRRLRTACERAKRALSSTTQTTIEVDSLFEGIDFYATITRARFEELCMDMFMKCMDPVEKCLRDAKVDKSQIHEVVLVGGSTRIPKVQQLLQDFFNGKELCKSINPDEAVAYGAAVQAAILTGEGDEKVQD…	AT5G42020	Heat shock protein 70 (Hsp 70) family protein	744	0	59
598	Predicted protein, containing pfam00183 heat shock protein 90 domain* (HSP90)	Physcomitrella patens	168034606	MDLIVNSLYSHKEVFLRELVSNASDALDKLRFLSVTDPKLMEPNPNMEIRIKADKDAGTITLIDSGIGMTREELVDSLGTIAQSGTAKFMKAMKENKENSSDNLIGQFGVGFYSAFLVAQRVVVSTKSAKSDKQYVWEAEADSGSYTIREETDPERMVPRGTVITLYLKEDEKFEYADPIRIENLVKNYSQFISFPIYTWQEKTREVEVEDTESEEVTEEDKPKEKQMKKISEKYSDWELVNETKPIWLRNSKDVSKEDYSTFYKSTFKEFIDPQAYIHFSTEGEIEFKSLLYIPGMAPFNSEDMVSGKTKNIRLYVKRVFISDEFDGELFPRYLGFVKGVVDSNDLPLNVSREILQESRIVRIMKKRLVRKTFDMIEEIANREKKEDYKQFWTSFGKN…	AT2G04030	Chaperone protein htpG family protein	922	0	65
259	T-complex protein 1 subunit alpha (TCP1α)	Arabidopsis thaliana	135535	MSISAQNPDISGDRQSGQDVRTQNVMACQAVSNIVKTSLGPVGLDKMLVDDIGDVTITNDGATILRMLEVEHPAAKVLVELAELQDREVGDGTTSVVIVAAELLKRANDLVRNKIHPTSIISGYRLAMRESCKYIEEKLVTKVEKLGKVPLINCAKTSMSSKLISGDSDFFANLVVEAVLSVKMTNQRGEIKYPIKGINILKAHGQSARDSYLLNGYALNTGRAAQGMPLRVSPAKIACLDFNLQKTKMQLGVQVVVNDPRELEKIRQREADMTKERIEKLLKAGANVILTTKGIDDMALKYFVEAGAIAVRRVRKEDMRHVAKATGATLVTTFADMEGEETFDPAHLGSADEVVEERIADDDVILIKGTKTSSAVSLILRGANDYMLDEMERALHDAL…	AT3G20050	T-complex protein 1 alpha subunit	1105	0	100
106	Hypothetical protein VITISV_000290, T-complex protein 1 subunit gamma* (TCP1γ)	Vitis vinifera	147784740	MQAPVLVLKDSLKRESGSKVQHANIQASKAVADIIRTTLGPRSMLKMLLDAGGGIVVTNDGNAILRELDLAHPAAKSMIELSRTQDEEVGDGTTSVIVLAGEMLHVAEAFIDKSYHPTVICRAYNKALEDAIAVLDKIAMSIDVKDRSTVLGLVKSCIGTKFTSQFGDLIADLAIDATTTVGVDLGQGLREVDIKKYIKVEKVPGGQLEDSKVLKGVMINKDVIAPGKMRRKIVNPRIILLDCPLEYKKGENQTNAELVKEEDWGVLLKMEEEYIESICMQILKFKPDLVITEKGLSDLACHYLSKAGVSAIRRLRKTDNNRIAKACGAVIVNRPDELQESDVGTGAGLFEVKKIGDEFFAFIVDCKDPKACTVLLRGPSKDLLNEVERNLQDAMCVAR…	AT5G26360	TCP-1/cpn60 chaperonin family protein	1037	0	92
	Protein degradation (8)
284	Alpha7 proteasome subunit (PSA7)	Nicotiana tabacum	14594925	MSSIGTGYDLSVTTFSPDGRVFQIEYAGKAVDNSGTVVGIKCKDGIVLGVEKLIASKMMLPGSNRRIHSVHRHSGMAVAGLAADGRQIVARTKSEATNYESTYGEPILVKELAERVASYVHLCTLYWWLRPFGCGVILGGYDRDGPQLYMVEPSGVSYRYFGAAIGKGRQAAKTEIEKLKLSEMTCRQGVIEVAKIIYGVHDEAKDKAFELETSWVCDESNRQHQKVPADLLEEAKAAAKAALEEMDAD	AT2G27020	20S proteasome alpha subunit G1	435	1e-122	89
199	Zinc dependent protease (ZDP)	Trifolium pratense	84468286	MAASLACLFGSGLSTQTNKIILGKDVNGRHPVFSRRHSSLRRELKTILVKASLDQREHEGRRGFLKLLNVTVGLPALLGSAKAYADEQGVSSSKMSYSRFLEYLEKDRVKKVDLFDNGTIAIVEAVSPELGNRVQRVRVQLPGLSQELLKKFREKNIDFAAHNAQEESDSFFANLIGNLAFPLIVIGGLFLLSRRSSGGSGGPGGSGFPFSVGQSKAKFQMEPNTGVTFDDVAGVDEAKQDFMEVVEFLKKPERFTTIGARIPKGVLLVGPPGTGKTLLAKAIAGEAGVPFFSISGSEFVEMFVGVGASRVRDLFKKAKENAPCIVFVDEIDAVGRQRGTGIGGGNDEREQTLNQLLTEMDGFEGNTGVIVIAATNRADILDSALLRPGRFDRQVSVDV…	AT2G30950	FtsH extracellular protease family	1028	0	77
227	Zinc dependent protease (ZDP)	Trifolium pratense	84468286	MAASLACLFGSGLSTQTNKIILGKDVNGRHPVFSRRHSSLRRELKTILVKASLDQREHEGRRGFLKLLNVTVGLPALLGSAKAYADEQGVSSSKMSYSRFLEYLEKDRVKKVDLFDNGTIAIVEAVSPELGNRVQRVRVQLPGLSQELLKKFREKNIDFAAHNAQEESDSFFANLIGNLAFPLIVIGGLFLLSRRSSGGSGGPGGSGFPFSVGQSKAKFQMEPNTGVTFDDVAGVDEAKQDFMEVVEFLKKPERFTTIGARIPKGVLLVGPPGTGKTLLAKAIAGEAGVPFFSISGSEFVEMFVGVGASRVRDLFKKAKENAPCIVFVDEIDAVGRQRGTGIGGGNDEREQTLNQLLTEMDGFEGNTGVIVIAATNRADILDSALLRPGRFDRQVSVDV…	AT2G30950	FtsH extracellular protease family	1028	0	77
37	Zinc dependent protease (ZDP)	Trifolium pratense	84468286	MAASLACLFGSGLSTQTNKIILGKDVNGRHPVFSRRHSSLRRELKTILVKASLDQREHEGRRGFLKLLNVTVGLPALLGSAKAYADEQGVSSSKMSYSRFLEYLEKDRVKKVDLFDNGTIAIVEAVSPELGNRVQRVRVQLPGLSQELLKKFREKNIDFAAHNAQEESDSFFANLIGNLAFPLIVIGGLFLLSRRSSGGSGGPGGSGFPFSVGQSKAKFQMEPNTGVTFDDVAGVDEAKQDFMEVVEFLKKPERFTTIGARIPKGVLLVGPPGTGKTLLAKAIAGEAGVPFFSISGSEFVEMFVGVGASRVRDLFKKAKENAPCIVFVDEIDAVGRQRGTGIGGGNDEREQTLNQLLTEMDGFEGNTGVIVIAATNRADILDSALLRPGRFDRQVSVDV…	AT2G30950	FtsH extracellular protease family	1028	0	77
869	Zinc metalloprotease (ZMP)	Arabidopsis thaliana	10120424	MLRSLTCSSTITSTSLFFRSFRQLPRSYLSPSSSTTVVGASGRNIRRLSTLEAAGRRLFLRRGLKLLSAASRGLNGQFSRLSIRAVATQSAPSSYPGQDEAEKLGFEKVSEEFISECKSKAVLFKHKKTGCEVMSVSNDDENKVFGIVFRTPPKDSTGIPHILEHSVLCGSRKYPMKEPFVELLKGSLHTFLNAFTYPDRTCYPVASTNKKDFYNLVDVYLDAVFFPKCVDDVHTFQQEGWHYELNDPSEDISYKGVVFNEMKGVYSQPDNILGRVTQQAKNTYGVDSGGDPKDIPKLTFEKFKEFHRQYYHPSNARIWFYGDDDPVHRLRVLSEYLDMFDASPARDSSKVEPQKLFSRPRRIVEKYPAGEDGDLKKKHMVCLNWLLSDKPLDLQTQLA…	AT1G49630	Presequence protease 2	2106	0	96
354	Predicted protein, containing pfam06480 FtsH extracellular domain* (FtsH)	Micromonas pusilla CCMP1545	303275720	MNAASALNASTATAFRQRACMAKSTRATKRAGATPVRARATTKTESSAAFEDKTLATTAASFMAFLAASGATSLVAMADDFAPPATAEAPTSALAQFQQSAKSAFSDADSQTAPSTAVADPNALPEGNTWRYSEFINAVQKGKVERVRFAKDGSSLQLTAVDGRRAAVTLPNDPELVDILAKNGVDISVSEGEQQGNFASLAGNLLFPLLAFGGLFFLFRRAQGGEGGGGGGFGGMGGGGPMDFGKSKSKFQEVPETGVTFVDVAGVDGAKLELQEVVDFLKNPDKYTALGAKIPKGCLLVGPPGTGKTLLAKAVAGEAGVPFFSCAASEFVELFVGVGASRVRDLFEKAKSKAPCIVFIDEIDAVGRQRGAGMGGGNDEREQTINQLLTEMDGFEGNT…	AT1G50250	FTSH protease 1	867	0	71
508	Predicted protein, ATP-dependent zinc metalloprotease FtsH*	Physcomitrella patens	168001910	MASLVLALAGSPAVAADVTPPLQFAPAGSEVTQIQTKPVENALVGAAKAAPAVAAKKVSDLPEGTNWRYSEFLNAVKGGKVERVRFAKDGTTLQLTAIDGKRANVTLPNDPDLVDILAMNGVDISVSEGEATNSYINVLGNLLFPLLAFGGLFFLFRRAQGGQGGPGGLGGPMDFGRSKSKFQEVPDTGVTFADVAGADQAKLELQEVVDFLKNPDKYTALGAKIPKGCLLVGPPGTGKTLLARAVSGEAGVPFFSCAASEFVELFVGVGASRVRDLFEKAKAKAPCIVFIDEIDAVGRQRGAGMGGGNDEREQTINQLLTEMDGFSGNSGVIVLAATNRPDVLDSALLRPGRFDRQVTVDRPDVQGRVRILQVHSRGKTLAKDVDFEKIARRTPGFTG…	AT1G50250	FTSH protease 1	906	0	76
59	ATP-dependent Clp protease ATP-binding subunit ClpC (CLPC)	Arabidopsis thaliana	9758239	MAMATRVLAQSTPPSLACYQRNVPSRGSGRSRRSVKMMCSQLQVSGLRMQGFMGLRGNNALDTLGKSRQDFHSKVRQAMNVPKGKASRFTVKAMFERFTEKAIKVIMLAQEEARRLGHNFVGTEQILLGLIGEGTGIAAKVLKSMGINLKDARVEVEKIIGRGSGFVAVEIPFTPRAKRVLELSLEEARQLGHNYIGSEHLLLGLLREGEGVAARVLENLGADPSNIRTQVIRMVGENNEVTANVGGGSSSNKMPTLEEYGTNLTKLAEEGKLDPVVGRQPQIERVVQILGRRTKNNPCLIGEPGVGKTAIAEGLAQRIASGDVPETIEGKKVITLDMGLLVAGTKYRGEFEERLKKLMEEIRQSDEIILFIDEVHTLIGAGAAEGAIDAANILKPALA…	AT5G50920	CLPC homologue 1	1754	0	94
	Stress and defense (7)
414	Hypothetical protein MIMGU_mgv1a021611mg, containing cd03015 2-cys peroxiredoxin domain* (Prx)	Erythranthe guttata	604334612	PNFEAEAVFDQEFIKVKLSEYIGKKYVILFFYPLDFTFVCPTEITAFSDRYSEFEKLNTEVLGVSVDSVFSHLAWIQTERKSGGLGDLNYPLVSDVTKSISKSYNVLIHDQGIALRGLFIIDKEGVIQHSTINNLGIGRSVDETLRTLQALQYVQDNPDEVCPAGWKPGDKSMKPDPKLSKDYFAAI	AT5G06290	2-cysteine peroxiredoxin B	366	1e-102	93
92	2-cys peroxiredoxin-like protein (Prx)	Hyacinthus orientalis	47027073	ELPLVGNSAPGFEAEAVFDQEFIKVKLSEYIGKKYVILFFYPLDFTFVCPTEITAFSDRYSEFEKVNTEVLGVSVDSVFSHLAWVQTDRKSGGLGDLNYPLVSDVTKSISKSYGVLIPDQGIALRGLFIIDKEGVIQHSTINNLGIGRSVDETMRTLQALQYVQENPDEVCPAGWKPGEKSMKPDPKRSKEYFASI	AT5G06290	2-cysteine peroxiredoxin B	388	1e-108	94
166	Ascorbate peroxidase (APX)	Eucalyptus grandis	702241628	MAKRYPNVSEEYRKAAAKCKRKLRGLIAEKHCAPIVLRLAWHSAGTFDVQTKTGGPFGTIRHSAELAHEANNGLDIAVRLLEPIKAQFPILSYADFYQLAGVVAVEITGGPEIPFHPGRPDKNEPPPEGRLPEATKGSDHLRQVFGHMGLSDKDIVALSGGHTLGRCHKERSGFEGPWTTNPLIFDNSYFKELLSGDKEGLIKLPSDKALIEDPIFRPLVEKYAADEDAFFADYEEAHLKLSELGFADA	AT1G07890	Ascorbate peroxidase 1	363	1e-101	69
244	Dehydroascorbate reductase-like protein (DHAR)	Solanum tuberosum	76573291	MAVEVCVKAAVGAPDVLGDCPFSQRVLLTLEEKKVTYKKHLINVSDKPKWFLEVNPEGKVPVINFGDKWIPDSDVIVGIIEEKYPNPSLIAPPEFASVGSKIFPTFVSFLKSKDSSDGTEQALLDELKALEEHLKAHGPYANGQNVCSVDMSLAPKLYHLEVALGHFKKWSVPESLSHVRNYMKLLFERESFQKTKAEEKYVIAGWAPKV	AT1G75270	Dehydroascorbate reductase 2	322	1e-88	71
361	Dehydroascorbate reductase-like protein (DHAR)	Solanum tuberosum	76573291	MAVEVCVKAAVGAPDVLGDCPFSQRVLLTLEEKKVTYKKHLINVSDKPKWFLEVNPEGKVPVINFGDKWIPDSDVIVGIIEEKYPNPSLIAPPEFASVGSKIFPTFVSFLKSKDSSDGTEQALLDELKALEEHLKAHGPYANGQNVCSVDMSLAPKLYHLEVALGHFKKWSVPESLSHVRNYMKLLFERESFQKTKAEEKYVIAGWAPKV	AT1G75270	Dehydroascorbate reductase 2	322	1e-88	71
899	Dehydroascorbate reductase-like protein (DHAR)	Solanum tuberosum	76160951	MAVEVCVKAAVGAPDVLGDCPFSQRVLLTLEEKKVTYKKHLINVSDKPKWFLEVNPEGKVPVINFGDKWIPDSDVIVGIIEEKYPNPSLIAPPEFASVGSKLFPTFVSFLKSKDSSDGTEQALLDELKALEEHLKAHGPYANGQNVCSVDMSLAPKLYHLEVALGHFKKWSVPESLSHVRNYMKLLFERESFQNTKAEEKYVIAGWAPKV	AT1G75270	Dehydroascorbate reductase 2	323	5e-89	71
294	Chloroplast drought-induced stress protein of 32kDa (CDSP32)	Solanum tuberosum	2582822	MATLTNFLLKPSPNLASITKISPSLYSNFPFEKSKQSIFKNLKTNKPLLITKATAAPDVEKKVAKSERVQKVNSMEELDEALKKAKNRLVVVEFAGKDSERSKNIYPFMVNLSKTCNDVDFLLVIGDETEKTKALCRREKIDKVPHFNFYKSMEKIHEEEGIGPDLLAGDVLYYGDSHSEVVQLHSREDVEKVIQDHKIDKKLIVLDVGLKHCGPCVKVYPTVIKLSKQMADTVVFARMNGDENDSCMQFLKDMDVIEVPTFLFIRDGEICGRYVGSGKGELIGEILRYQGVRVTY	AT1G76080	Chloroplastic drought-induced stress protein of 32 kD	390	1e-109	65
aAssigned spot number as indicated in Figure 3. bThe name and functional category of the differentially abundant proteins identified by ESI-Q-TOF and ESI-Q-Trap tandem mass spectrometry. Protein names marked with an asterisk (*) have been edited by us depending on searching against NCBI non-redundant protein database for functional domain. The abbreviations for the protein names are indicated in …
